# Supplementary figures and images for: Effects of marketable ages on meat quality through fiber characteristics in the goose
Source: PubMed Central journal article supplement — Poult Sci. 2020 Dec 1;100(2):728–37. doi: 10.1016/j.psj.2020.11.053 (PMC7858183; doi:10.1016/j.psj.2020.11.053), 2020-12-01

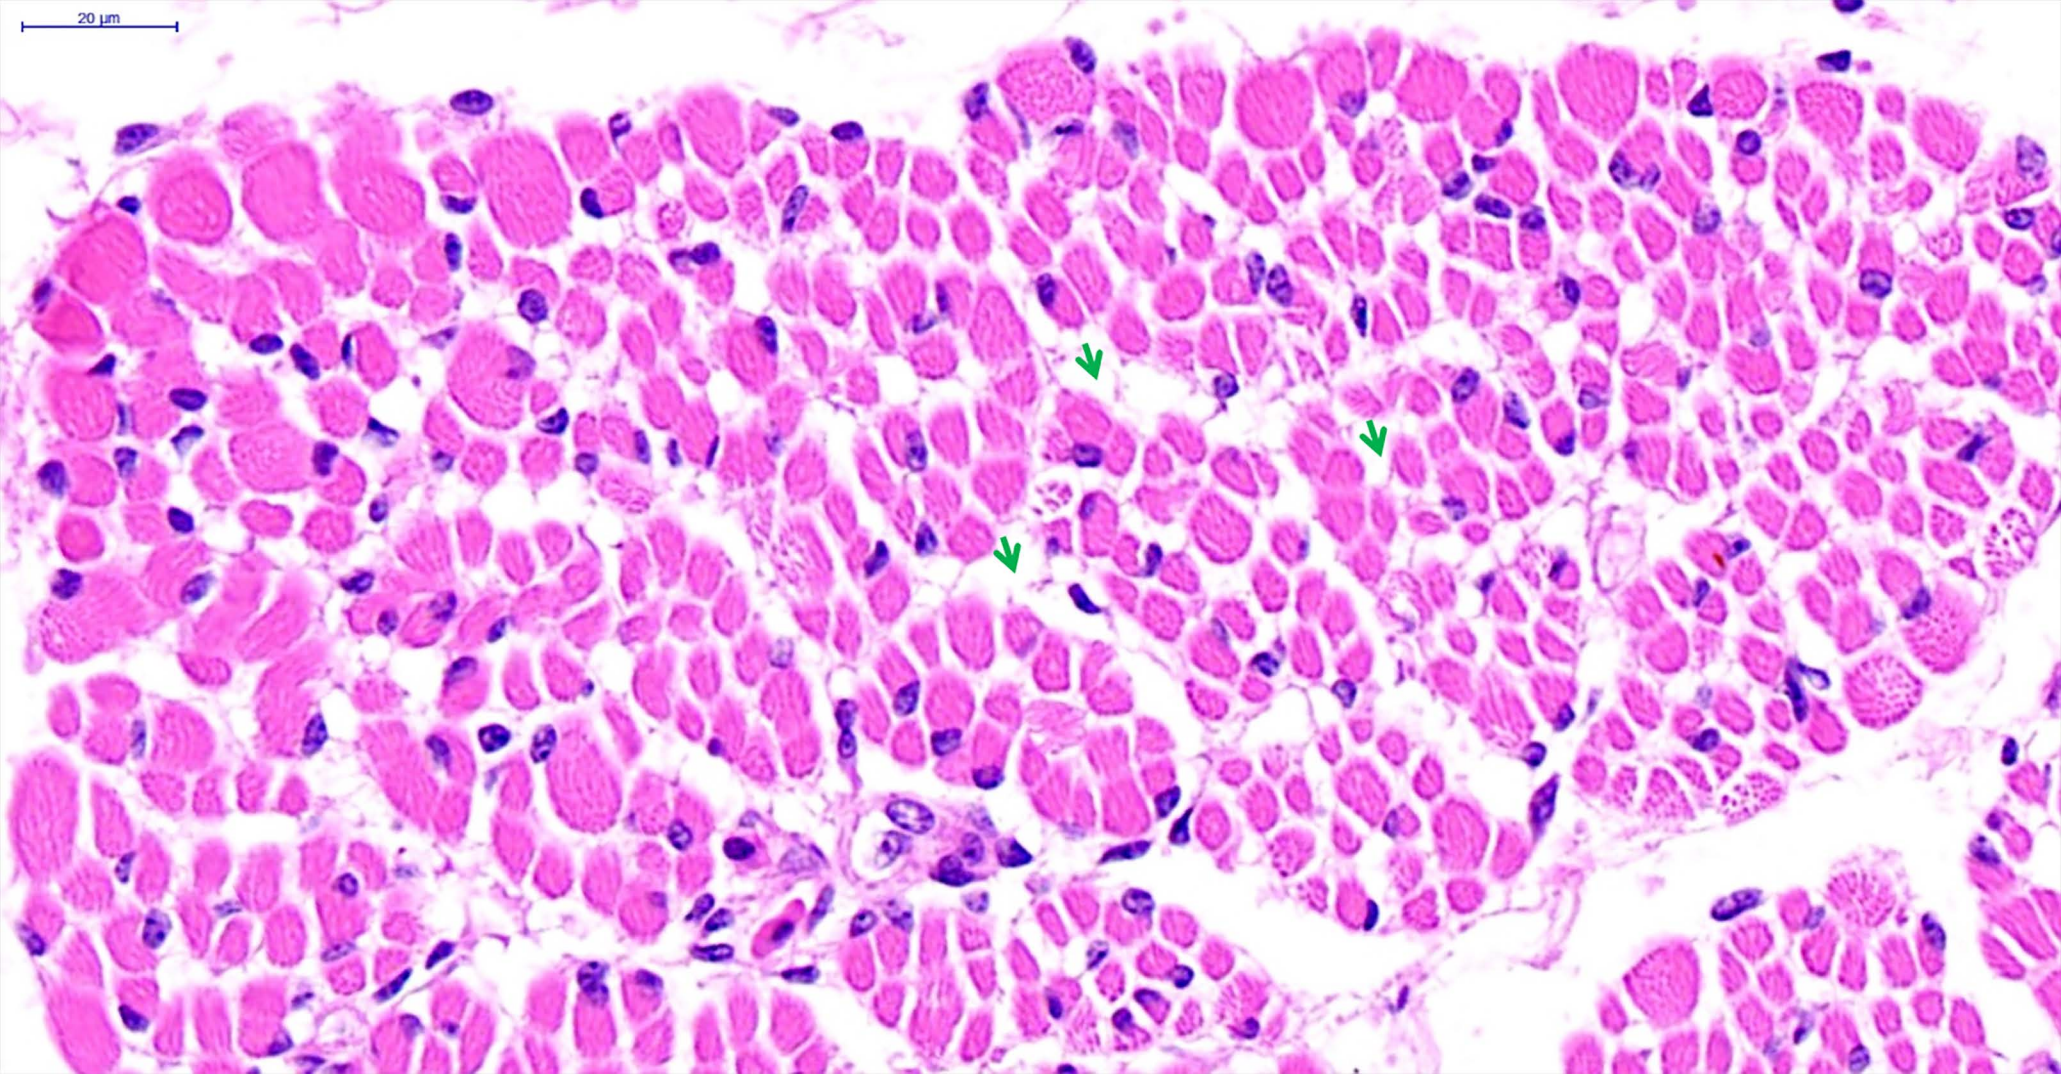

Supplement: mmc1.pdf [file mmc1.pdf]
